# Supplementary material for: In Vivo Study of the Sorbicillinoid Gene Cluster in Trichoderma reesei
Source: PubMed Central journal article supplement (PMC5654950; doi:10.3389/fmicb.2017.02037), 2017-10-20
Supplement: Data_Sheet_1.pdf [file Data_Sheet_1.pdf]

## *Supplementary Material*

### *In vivo* study of the sorbicillinoid gene cluster in *Trichoderma reesei*

Christian Derntl, Fernando Guzmán-Chávez, Thiago M. Mello-de-Sousa, Hans-Jürgen Busse, Arnold J.M. Driessen, Robert L. Mach, Astrid R. Mach-Aigner\*

**Correspondence:** Dr. Astrid Mach-Aigner: astrid.mach-aigner@tuwien.ac.at

**Table S1. Primers used throughout this study**

| Primer name                  | Sequence (5' – 3')             | Usage                       |
|------------------------------|--------------------------------|-----------------------------|
| sor1_5fwd-NotI               | GCGGCCGCGTGCTGATAAAGGACAAGATG  |                             |
| sor1_5rev-BglII              | AGATCTCTGAATCTAGAGGCTGGGAAC    |                             |
| sor1_3fwd-ClaI               | ATCGATAGATCCGCAATTCATCCTCG     |                             |
| sor1_3rev-HindIII            | AAGCTTGATGAATACTGACGGACGAGG    |                             |
| sor3_5fwd-NotI               | GCGGCCGCGTCAAGTACCTAGGTATGCTTC |                             |
| sor3_5rev-BspEI              | TCCGGACGTTGGGAGTAAAGTGTATGCC   |                             |
| sor3_3fwd-XbaI               | TCTAGACGAGATCCTAGAACGAAGCC     |                             |
| sor3_3rev-BglII              | AGATCTCACTGGGCTGTTAGCATTGTC    | Cloning                     |
| sor4_5fwd-HindIII            | AAGCTTGTAAGATCGGACCAGTGGCTG    |                             |
| sor4_5rev-BcuI               | ACTAGTGACTGCGATTCCGAAGGC       |                             |
| sor4_3fwd-BspEI              | TCCGGAGTGGCGAATTGCTAACAAGAC    |                             |
| sor4_3rev-NotI               | GCGGCCGCCAATAGGTATCCTGCCTTG    |                             |
| P <sub>sor3</sub> _fwd-BspEI | TCCGGACAGGCGTGGAAGGATAGC       |                             |
| P <sub>sor3</sub> _rev-SpeI  | ACTAGTCTTGTTACTGGCTGTAGGAC     |                             |
| ACRE_048140_fwd-SpeI         | ACTAGTATGACCATCCCGGGCG         |                             |
| ACRE_048140_rev-BamHI        | GGATCCTTAACCTCGAGTCGCATTGATCC  |                             |
| pyr4_Prev                    | GATAATACCTACCCAGTCAGACC        |                             |
| pyr4_Tfwd                    | GCAGCGTAACATCTTCAGAGC          |                             |
| sor1_test5                   | GCTTCACACAGGGATGGCC            |                             |
| sor1_test3                   | GTGACGATGACGGTTTTGCC           |                             |
| sor3_test5                   | CGATGAGTCTGTATTGAAGGG          |                             |
| sor3_test3                   | CCAAGAGGACGGCTGAATC            | Genomic<br>characterization |
| sor4_test5                   | GGACTATCAAAGGGACCGG            |                             |
| sor4_test3                   | CAAAGCCATGCACCGAC              |                             |
| 5pyr4_fwd2                   | CCAGACGGTGATTACATATACG         |                             |
| Tpyr4_rev2                   | ACAAGGACTGAGGATGTTCGG          |                             |
| pyr4_3f                      | AGACGAGGACCAGCAGACC            |                             |

**Table S1. Primers used throughout this study (continued)**

| Primer name     | Sequence (5' – 3')      | Usage  |
|-----------------|-------------------------|--------|
| ypr1_q1f        | GTTCTACACACGACTTCCCATG  |        |
| ypr1_q1r        | CCAGCCACTGATGTCGTATCC   |        |
| sor1_q1f        | GGCCTTTGTTCTTCATGACTCC  |        |
| sor1_q1r        | GTGAGCCAAGGCATCTTCG     |        |
| sor3_q1f        | CTTCGTCTTGAGTGTTCCCTCTG | RT-PCR |
| sor3_q1r        | GGCAGCAACGATATAAGCGAG   |        |
| sor4_q1f        | CCTGGTAGTGAGAAACACGG    |        |
| sor4_q1r        | GGCCAACAGTCGGACATATC    |        |
| ACRE_048140_q1f | CACAAACTCGCGCATCTTCAG   |        |
| ACRE_048140_q1r | ATGACCACGGCGTTGATCCAG   |        |

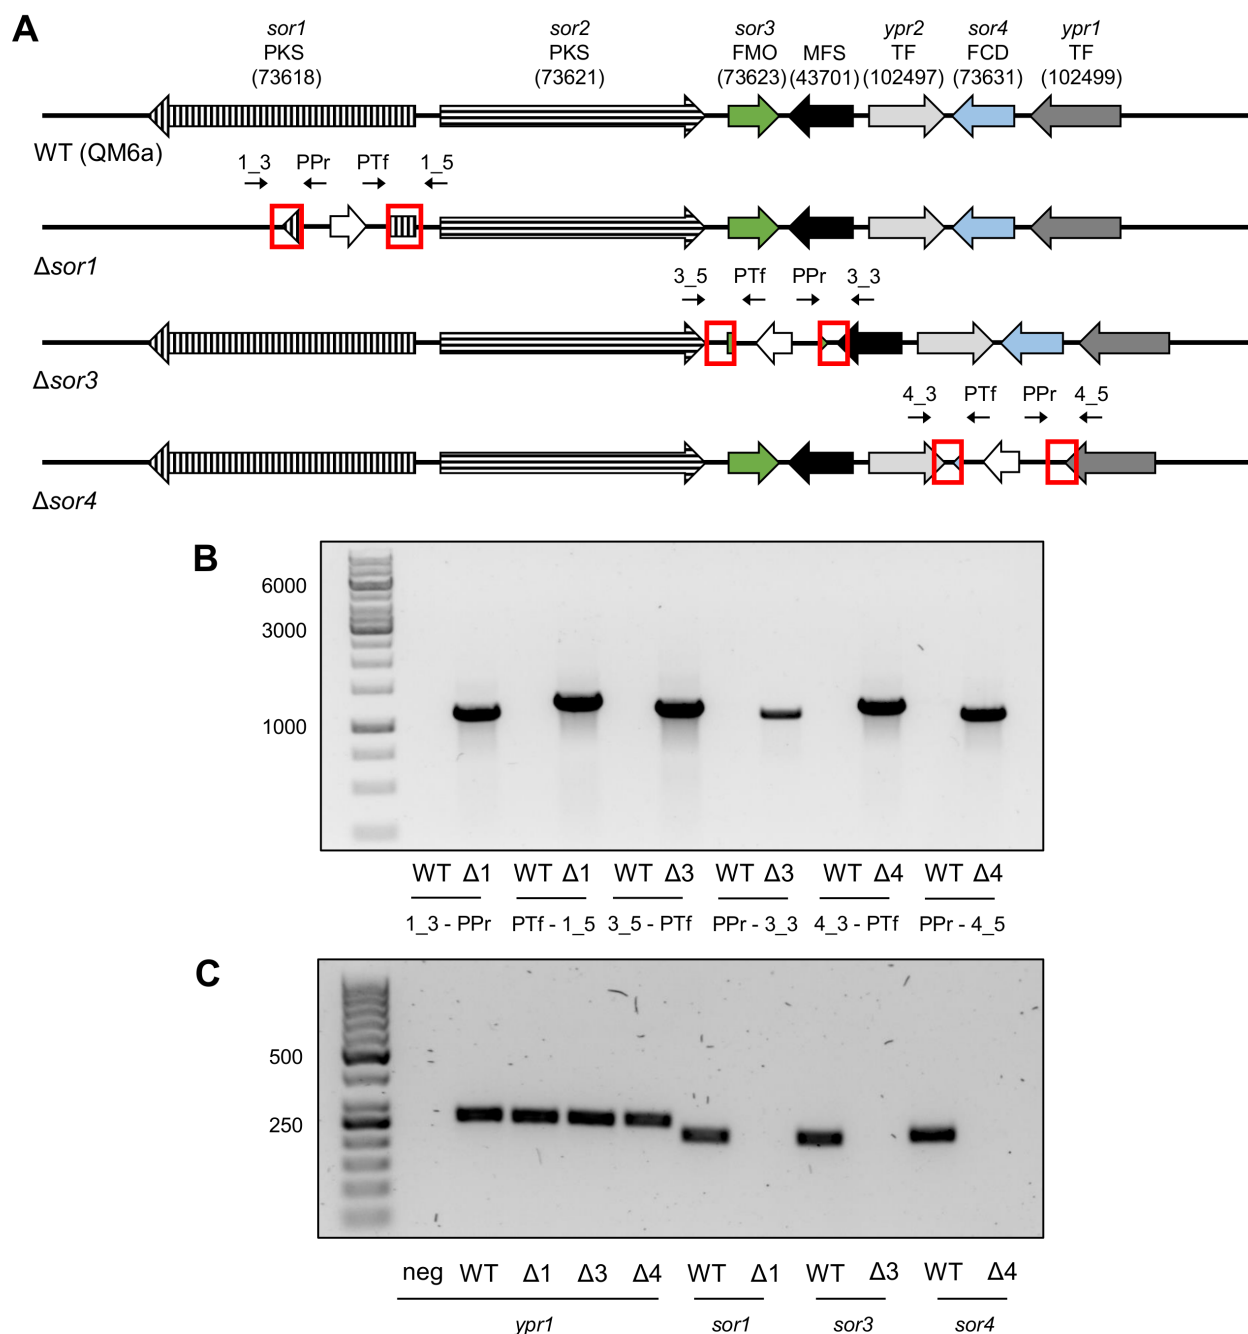

**Figure S1. Deletion of *sor1*, *sor3*, and *sor4* in *T. reesei***

(A) The uridine auxotrophic strain  $\Delta pyr4$ , which contains the wild-type gene cluster, like the parent strain QM6a, was transformed with the plasmids pCD $\Delta sor1$ , pCD $\Delta sor3$ , or pCD $\Delta sor4$ . They bear the deletion cassettes to replace the genes *sor1*, *sor3*, or *sor4* with the marker *pyr4* (white arrow) via homologous recombination resulting in the strains  $\Delta sor1$ ,  $\Delta sor3$ , and  $\Delta sor4$ . Arrows indicate the genes of the cluster. Flanking regions used for homologous recombination are indicated by red boxes. Orientation, distance, and size are to scale. PKS, polyketide synthase; FMO, FAD-dependent monooxygenase; MFS, transporter of the multifacilitator superfamily; TF, transcription factor; FCD, FAD/FMN-containing dehydrogenase. Protein IDs are given in brackets. Small arrows represent

**Figure S1. Deletion of *sor1*, *sor3*, and *sor4* in *T. reesei* (continued)**

approximate position of the indicated primers used for genomic characterization. **(B)** PCRs were performed to test the successful integration of the deletion cassettes using chromosomal DNA from  $\Delta pyr4$  (WT),  $\Delta sor1$  ( $\Delta 1$ ),  $\Delta sor3$  ( $\Delta 3$ ), and  $\Delta sor4$  ( $\Delta 4$ ) as template and the indicated primers. 1\_3, sor1\_test3; PPr, pyr4\_Prev; PTf, pyr4\_Tfwd; 1\_5, sor1\_test5; 3\_5, sor3\_test5; 3\_3, sor3\_test3; 4\_3, sor4\_test3; 4\_5, sor4\_test5. **(C)** A RT-PCR analysis was performed to test for the presence or absence of the indicated transcripts in the strains  $\Delta pyr4$  (WT),  $\Delta sor1$  ( $\Delta 1$ ),  $\Delta sor3$  ( $\Delta 3$ ), and  $\Delta sor4$  ( $\Delta 4$ ). Water was used as template in the negative control (neg).

**A**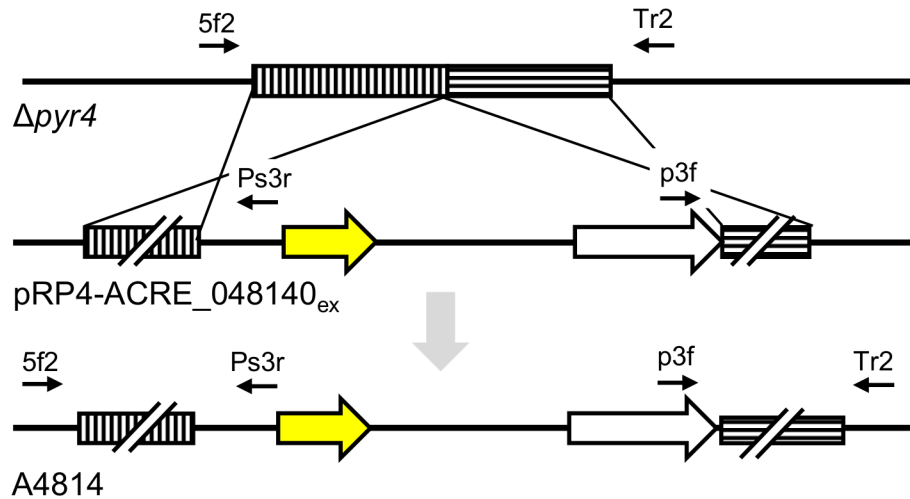**B**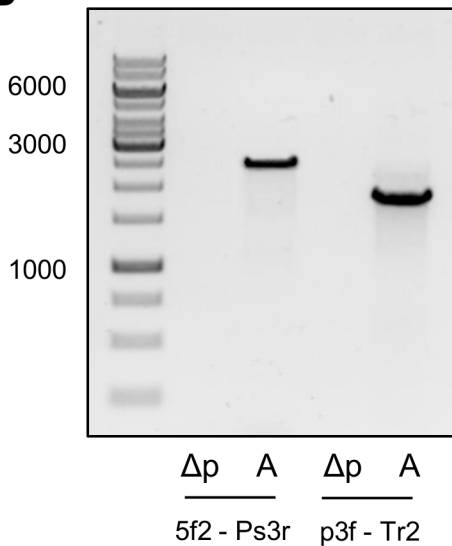**C**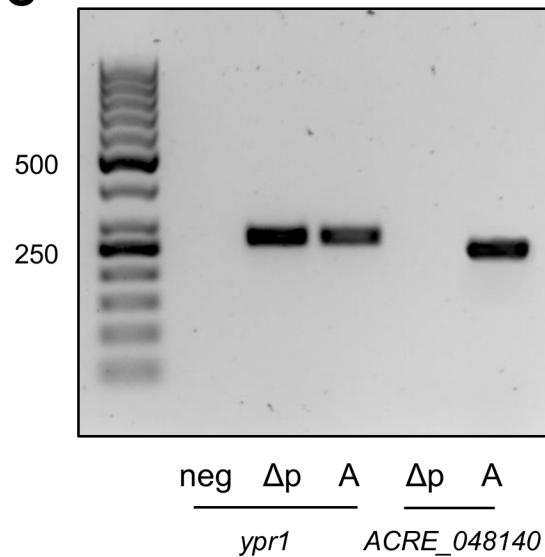**Figure S2. Insertion of ACRE\_048140 expression cassette**

(A) The uridine auxotrophic strain  $\Delta pyr4$  was transformed with the plasmid pRP4-ACRE\_048140<sub>ex</sub>, which contains the expression cassette for the hydrolase ACRE\_048140 (yellow arrow) and the *pyr4* gene (white arrow) between the flanking regions (hatched boxes) of *pyr4*. Upon homologous recombination, the gene encoding for ACRE\_048140 is integrated at the *pyr4* locus and the prototrophy is re-established, resulting in the strain A4814. Orientation, distance, and size are to scale. The grey arrows indicate the homologous recombination event. Small arrows represent binding approximate position of the indicated primers used for genomic characterization in (B). PCRs were performed to test for the successful integration of the expression cassettes using chromosomal DNA from  $\Delta pyr4$  ( $\Delta p$ ), and A4814 (A) as template and the indicated primers. 5f2, 5pyr4\_fwd2; Ps3r, P<sub>sor3</sub>\_fwd-BspEI; p3f, pyr4\_3f; Tr2, Tpyr4\_rev2. (C) A RT-PCR was performed to test for the presence or absence of the indicated transcripts in the strains  $\Delta pyr4$   $\Delta pyr4$  ( $\Delta p$ ), and A4814 (A). Water was used as template in the negative control (neg).
